# Supplementary material
Source: Springer Nature journal article supplement (https://www.springermedizin.de/resource/supplementary/12906_2013_1617_MOESM5_ESM.pdf/9522632)

SST 500  $\mu\text{g/ml}$

Time (hours)

1 6 24

Temporal up-pattern  
Temporal down-pattern

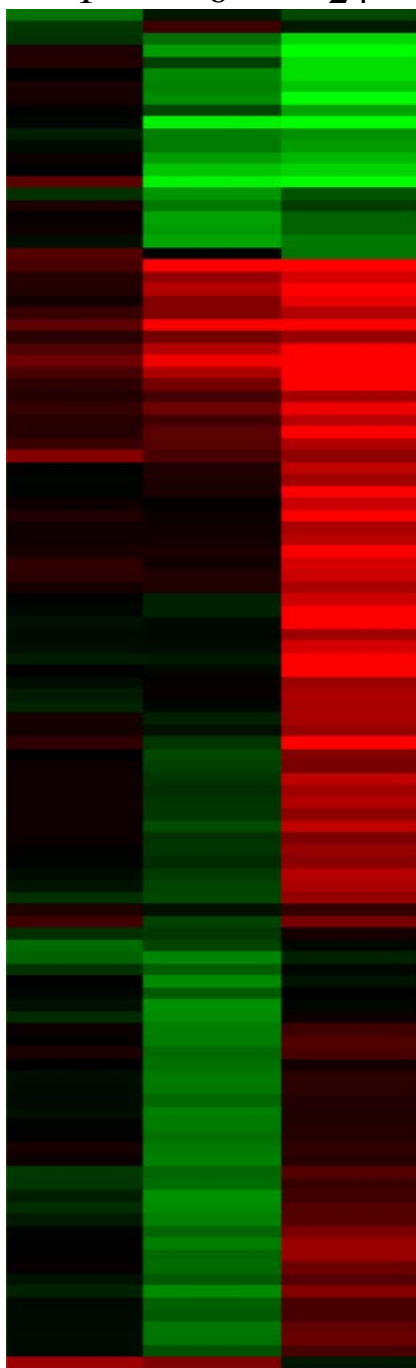

- Nicotine addiction
- Olfactory transduction
- Autoimmune thyroid disease
- Allograft rejection
- Cell adhesion molecules (CAMs)
- Complement and coagulation cascades
- Type I diabetes mellitus
- Phagosome
- Epstein-Barr virus infection
- Linoleic acid metabolism
- Staphylococcus aureus infection
- Drug metabolism - other enzymes
- Metabolism of xenobiotics by cytochrome P450
- Retinol metabolism
- Caffeine metabolism
- Endocrine and other factor-regulated calcium reabsorption
- Arachidonic acid metabolism
- Chemical carcinogenesis
- PPAR signaling pathway
- Drug metabolism - cytochrome P450
- Prion diseases
- Malaria
- Pertussis
- Hematopoietic cell lineage
- Cytokine-cytokine receptor interaction
- NF-kappa B signaling pathway
- NOD-like receptor signaling pathway
- Toll-like receptor signaling pathway
- Salmonella infection
- Rheumatoid arthritis
- TNF signaling pathway
- Leishmaniasis
- Apoptosis
- Glycosphingolipid biosynthesis - lacto and neolacto series
- Toxoplasmosis
- Amoebiasis
- Chagas disease (American trypanosomiasis)
- African trypanosomiasis
- Chemokine signaling pathway
- DNA replication
- Cell cycle
- Pancreatic cancer
- Glutathione metabolism
- HIF-1 signaling pathway
- Mineral absorption
- Homologous recombination
- Small cell lung cancer
- p53 signaling pathway
- Osteoclast differentiation
- Nicotine and nicotinamide metabolism
- Galactose metabolism
- Sulfur metabolism
- Fc epsilon RI signaling pathway
- Fanconi anemia pathway
- Progesterone-mediated oocyte maturation
- ECM-receptor interaction
- Transcriptional misregulation in cancer
- Protein digestion and absorption
- Oocyte meiosis
- Bladder cancer
- Pathways in cancer
- Taurine and hypotaurine metabolism
- Axon guidance
- Regulation of actin cytoskeleton
- Sphingolipid metabolism
- Colorectal cancer
- Focal adhesion
- Chronic myeloid leukemia
- Melanoma
- Proteoglycans in cancer
- Leukocyte transendothelial migration
- PI3K-Akt signaling pathway
- Starch and sucrose metabolism
- Tryptophan metabolism
- Glycolysis / Gluconeogenesis
- Alzheimer's disease
- ABC transporters
- Neuroactive ligand-receptor interaction
- Regulation of autophagy
- Proximal tubule bicarbonate reclamation
- Bile secretion
- Serotonergic synapse
- Melanogenesis
- Gap junction
- Collecting duct acid secretion
- Phosphatidylinositol signaling system
- Inositol phosphate metabolism
- ErbB signaling pathway
- GnRH signaling pathway
- Long-term depression
- Tight junction
- Endocytosis
- Insulin secretion
- Vascular smooth muscle contraction
- Fatty acid metabolism
- Bacterial invasion of epithelial cells
- Adherens junction
- Morphine addiction
- GABAergic synapse
- Gastric acid secretion
- Circadian entrainment
- Aldosterone-regulated sodium reabsorption
- Arrhythmogenic right ventricular cardiomyopathy (ARVC)
- Glioma
- Non-small cell lung cancer
- Endometrial cancer
- Dopaminergic synapse
- Carbohydrate digestion and absorption
- Glutamatergic synapse
- Alcoholism
- Retrograde endocannabinoid signaling
- Cholinergic synapse
- Insulin signaling pathway
- Graft-versus-host disease

-0.5 0 0.5

Activity

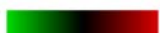

Supplement: MOESM5 [file 9522632]
